# Supplementary material for: Association between Overweight/Obesity and the Safety and Efficacy of COVID-19 Vaccination: A Systematic Review
Source: MDPI journal article supplement (doi:10.3390/vaccines11050996), 2023-05-17
Supplement: s1 [file s1]

## File S1: Search Strategies

### Medline

(exp COVID-19 Vaccines/OR ((COVID-19/OR SARS-CoV-2/) AND (Vaccination/OR exp Vaccines/)) OR (((SARS-CoV-2 OR covid\* OR coronavir\*) ADJ3 vaccin\*)):ab, ti. OR (((SARS-CoV-2 OR covid\* OR coronavir\*) AND vaccin\*)):ti.) AND (exp Obesity/OR Body Mass Index/OR Body Weight/OR Anthropometry/OR body fat percentage/OR Waist Circumference/OR Waist-Hip Ratio/OR Waist-Height Ratio/OR Body Composition/OR Body Fat Distribution/OR ((Risk Factors/OR Risk/) AND ("Drug-Related Side Effects and Adverse Reactions"/OR Safety/OR Vaccine Efficacy/)) OR (obesit\* OR obese\* OR overweight OR bmi OR body-mass\* OR body-weight\* OR anthropometr\* OR (waist ADJ3 (hip OR circumfere\* OR ratio\*)) OR (hip ADJ3 circumfere\*) OR (weight ADJ3 height) OR body-fat OR fat-mass OR adipos\* OR ((risk\* OR factor\*) ADJ6 (safet\* OR efficac\* OR effectiv\*)):ab, ti.)

### Embase.com

('SARS-CoV-2 vaccine'/exp OR (('coronavirus disease 2019'/exp OR 'Severe acute respiratory syndrome coronavirus 2'/exp) AND (vaccination/de OR vaccine/exp)) OR (((SARS-CoV-2 OR covid\* OR coronavir\*) NEAR/3 vaccin\*)):ab, ti OR (((SARS-CoV-2 OR covid\* OR coronavir\*) AND vaccin\*)):ti) AND (obesity/de OR 'body mass'/de OR 'body weight disorder'/de OR 'body weight'/de OR anthropometry/de OR 'anthropometric parameters'/de OR 'body fat percentage'/de OR 'waist circumference'/de OR 'waist hip ratio'/de OR 'waist to height ratio'/de OR 'weight height ratio'/de OR 'total body fat'/de OR 'hip circumference'/de OR 'fat mass'/de OR 'body composition'/de OR 'body adiposity index'/de OR 'body fat distribution'/de OR 'body fat percentage'/de OR (('risk factor'/de OR risk/de) AND ('adverse event'/de OR safety/de OR 'efficacy parameters'/de)) OR (obesit\* OR obese\* OR overweight OR bmi OR body-mass\* OR body-weight\* OR anthropometr\* OR (waist NEAR/3 (hip OR circumfere\* OR ratio\*)) OR (hip NEAR/3 circumfere\*) OR (weight NEAR/3 height) OR body-fat OR fat-mass OR adipos\* OR ((risk\* OR factor\*) NEAR/6 (safet\* OR efficac\* OR effectiv\*)):ab, ti)

### Web of science

TS=((((SARS-CoV-2 OR covid\* OR coronavir\*) NEAR/2 vaccin\*)) OR (((SARS-CoV-2 OR covid\* OR coronavir\*) AND vaccin\*)):ti) AND ((obesit\* OR obese\* OR overweight OR bmi OR body-mass\* OR body-weight\* OR anthropometr\* OR (waist NEAR/2 (hip OR circumfere\* OR ratio\*)) OR (hip NEAR/2 circumfere\*) OR (weight NEAR/2 height) OR body-fat OR fat-mass OR adipos\* OR ((risk\* OR factor\*) NEAR/5 (safet\* OR efficac\* OR effectiv\*))))))

### Cochrane

(((((SARS NEXT CoV NEXT 2 OR covid\* OR coronavir\*) NEAR/3 vaccin\*)):ab, ti OR (((SARS NEXT CoV NEXT 2 OR covid\* OR coronavir\*) AND vaccin\*)):ti) AND ((obesit\* OR obese\* OR overweight OR bmi OR body NEXT mass\* OR body NEXT weight\* OR anthropometr\* OR (waist NEAR/3 (hip OR circumfere\* OR ratio\*)) OR (hip NEAR/3 circumfere\*) OR (weight NEAR/3 height) OR body NEXT fat OR fat NEXT mass OR adipos\* OR ((risk\* OR factor\*) NEAR/6 (safet\* OR efficac\* OR effectiv\*)):ab, ti)

### Google scholar

"SARS-CoV-2"|covid|coronavirus vaccination|vaccine obesity|obese|overweight|bmi|"body-mass weight"|"waist hip|circumference"|"hip circumference"|"body-fat"|"fat-mass"

**Table S1.** Risk-of-Bias Assessment using the Joanna Briggs Institute (JBI) Critical Appraisal Checklist for Cohort Studies.

| Study              | 1. Two Groups Similar and Recruited from the Same Population? | 2. Were the Exposures Measured Similarly, Assign People to Both Exposed and Unexposed Groups? | 3. Was the Exposure Measured in a Valid and Reliable Way? | 4. Were Confounding Factors Identified? | 5. Were Strategies to Deal with Confounding Factors Stated? | 6. Were the Participants Free of the Outcome at the Start of the Study (or the Moment of Exposure)? | 7. Were the Outcomes Measured in a Valid and Reliable Way? | 8. Was the Follow-Up Time Reported and Sufficient to Be Long Enough for Outcomes to Occur? | 9. Was Follow-Up Complete, and If Not, Were the Reasons to Loss of Follow-Up Described and Explored? | 10. Were Strategies to Address Incomplete Follow-Up Utilized? | 11. Was Appropriate Statistical Analysis Used? | % Yes | Risk of bias |
|--------------------|---------------------------------------------------------------|-----------------------------------------------------------------------------------------------|-----------------------------------------------------------|-----------------------------------------|-------------------------------------------------------------|-----------------------------------------------------------------------------------------------------|------------------------------------------------------------|--------------------------------------------------------------------------------------------|------------------------------------------------------------------------------------------------------|---------------------------------------------------------------|------------------------------------------------|-------|--------------|
| Malavazos AE, 2022 | Yes                                                           | Yes                                                                                           | Yes                                                       | Unclear                                 | No                                                          | Yes                                                                                                 | Yes                                                        | Yes                                                                                        | Yes                                                                                                  | No                                                            | Yes                                            | 73%   | Low          |
| Gaborit B, 2023    | Yes                                                           | Yes                                                                                           | Yes                                                       | Yes                                     | No                                                          | Yes                                                                                                 | Yes                                                        | Yes                                                                                        | Yes                                                                                                  | Unclear                                                       | Yes                                            | 82%   | Low          |
| Zhu Q, 2022        | Yes                                                           | Yes                                                                                           | Yes                                                       | Unclear                                 | No                                                          | Yes                                                                                                 | Yes                                                        | Yes                                                                                        | Yes                                                                                                  | No                                                            | Yes                                            | 73%   | Low          |
| Tubja-roen, 2022   | Yes                                                           | Yes                                                                                           | Yes                                                       | Unclear                                 | No                                                          | Yes                                                                                                 | Yes                                                        | Yes                                                                                        | Yes                                                                                                  | No                                                            | No                                             | 64%   | Moderate     |
| Yamamoto S, 2022   | Yes                                                           | Yes                                                                                           | Yes                                                       | Yes                                     | No                                                          | Unclear                                                                                             | Yes                                                        | Yes                                                                                        | Yes                                                                                                  | Yes                                                           | Yes                                            | 82%   | Low          |
| Kara Z, 2022       | Yes                                                           | Yes                                                                                           | Yes                                                       | Unclear                                 | No                                                          | Yes                                                                                                 | Yes                                                        | Yes                                                                                        | No                                                                                                   | No                                                            | Yes                                            | 64%   | Moderate     |
| Pellini R, 2021    | Yes                                                           | Yes                                                                                           | Yes                                                       | Unclear                                 | No                                                          | Yes                                                                                                 | Yes                                                        | Yes                                                                                        | Yes                                                                                                  | Unclear                                                       | Yes                                            | 73%   | Low          |
| Piernas C, 2022    | Yes                                                           | Yes                                                                                           | Yes                                                       | Yes                                     | Yes                                                         | Unclear                                                                                             | Yes                                                        | Unclear                                                                                    | Yes                                                                                                  | Yes                                                           | Yes                                            | 82%   | Low          |
| Watanabe M, 2022   | Yes                                                           | Yes                                                                                           | Yes                                                       | Unclear                                 | No                                                          | Yes                                                                                                 | Yes                                                        | Yes                                                                                        | No                                                                                                   | No                                                            | Yes                                            | 64%   | Moderate     |
| Yoshida, 2022      | No                                                            | Unclear                                                                                       | Yes                                                       | Yes                                     | Yes                                                         | Yes                                                                                                 | Yes                                                        | Yes                                                                                        | No                                                                                                   | No                                                            | Yes                                            | 73%   | Low          |

Notes: The risk of bias was ranked as high when the study reached 49% “yes” scores, moderate when the study reached 50 to 69% “yes” scores, and low when the study reached more than 70% “yes” scores.

**Table S2.** Risk-of-Bias Assessment using the Joanna Briggs Institute (JBI) Critical Appraisal Checklist for Cross-Sectional Studies.

| No. | Checklist questions                                                      | Faizo AA, 2023 | Lee SW, 2021 | Iguacel I, 2021 | Sutardi, 2022 | Watanabe M, 2022 |
|-----|--------------------------------------------------------------------------|----------------|--------------|-----------------|---------------|------------------|
| 1.  | Were the criteria for inclusion in the sample clearly defined?           | Yes            | Yes          | Yes             | Yes           | Yes              |
| 2.  | Were the study subjects and the setting described in detail?             | Unclear        | Yes          | No              | Yes           | Yes              |
| 3.  | Was the exposure measured in a valid and reliable way?                   | Yes            | Yes          | Yes             | Yes           | Yes              |
| 4.  | Were objective, standard criteria used for measurement of the condition? | Yes            | Yes          | Yes             | Unclear       | Yes              |
| 5.  | Were confounding factors identified?                                     | Unclear        | Unclear      | Yes             | Unclear       | No               |
| 6.  | Were strategies to deal with confounding factors stated?                 | No             | No           | Unclear         | No            | No               |
| 7.  | Were the outcomes measured in a valid and reliable way?                  | Yes            | Yes          | Yes             | Unclear       | Yes              |
| 8.  | Was appropriate statistical analysis used?                               | Yes            | Yes          | Yes             | No            | Yes              |
|     | % Yes                                                                    | 63%            | 75%          | 75%             | 38%           | 75%              |
|     | Risk of bias                                                             | Moderate       | Low          | Low             | High          | Low              |

Notes: The risk of bias was ranked as high when the study reached 49% “yes” scores, moderate when the study reached 50 to 69% “yes” scores, and low when the study reached more than 70% “yes” scores.
